# Supplementary material
Source: HighWire-hosted journal article supplement (doi:10.1101/rna.079969.124)
Supplement: Supplemental_Information.pdf [file Supplemental_Information.pdf]

## Supporting information

### **A comparative analysis of peptide-delivered antisense antibiotics employing diverse nucleotide mimics**

Chandradhish Ghosh<sup>1</sup>, Linda Popella<sup>2</sup>, V. Dhamodharan<sup>3</sup>, Jakob Jung<sup>2</sup>, Julia Dietzsch<sup>3</sup>,  
Lars Barquist<sup>1,4</sup>, Claudia Höbartner<sup>3</sup>, Jörg Vogel<sup>1,2,4\*</sup>

<sup>1</sup> Helmholtz Institute for RNA-based Infection Research (HIRI), Helmholtz Centre for Infection Research (HZI), D-97080 Würzburg, Germany

<sup>2</sup> University of Würzburg, Institute of Molecular Infection Biology (IMIB), D-97080 Würzburg, Germany

<sup>3</sup> University of Würzburg, Institute of Organic Chemistry, and Center for Nanosystems Chemistry, Am Hubland, 97074 Würzburg, Germany

<sup>4</sup> University of Würzburg, Faculty of Medicine, Würzburg, Germany

\* Correspondence: [joerg.vogel@uni-wuerzburg.de](mailto:joerg.vogel@uni-wuerzburg.de)

## **Table of Contents**

**Supplementary Figure S1.** Chemical structures of ASOs used in this study (p. 3)

**Supplementary Figure S2.** Structures and mass spectra of KFF conjugated ASOs used in this study (p. 4-7)

**Supplementary Figure S3.** Assessment of melting temperatures of each ASO:RNA duplex (p. 8)

**Supplementary Figure S4.** Microscale thermophoresis assay with all compounds (p. 9-10)

**Supplementary Figure S5.** *In vitro* translation assay (p. 11)

**Supplementary Figure S6.** Antibacterial assays (p.12)

**Supplementary Figure S7.** Detection of fragments of KFF conjugates of PNA and PMO in the periplasm of *Salmonella* (p. 13)

**Supplementary Figure S8.** MALDI-TOF spectra of the periplasm of *Salmonella* post-treatment with different KFF-ASO conjugates (p. 14)

**Supplementary Table S1.** Oligonucleotide sequences used for the generation of the AcpP(1-17)::GFP fusion construct (p.15)

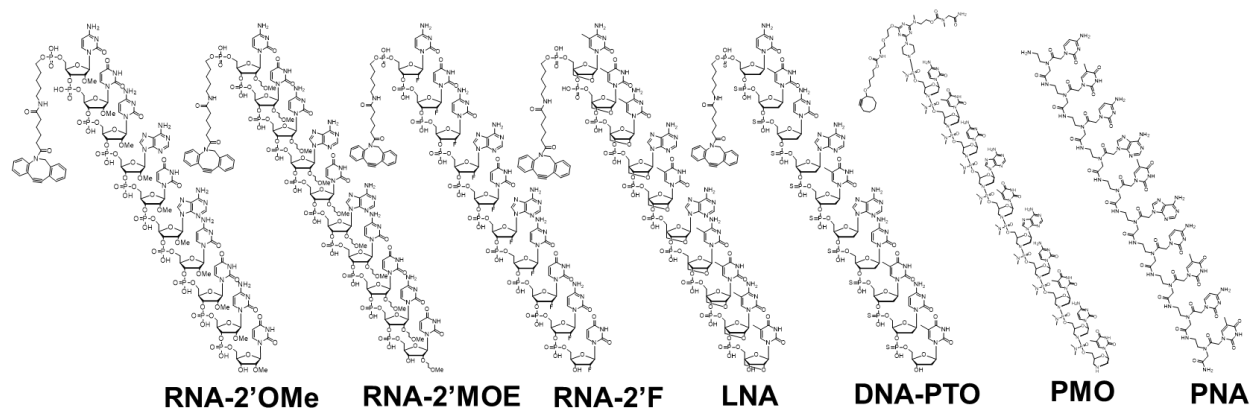

**Supplementary Figure S1. Chemical structures of ASOs used in this study.**

**A**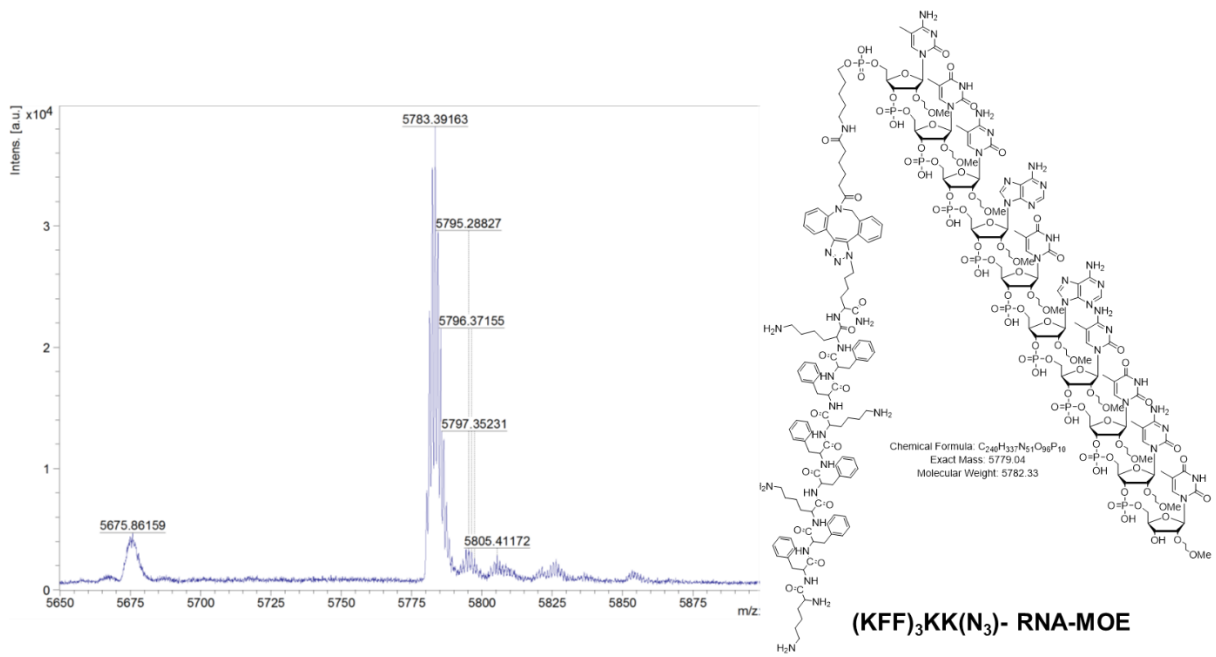**B**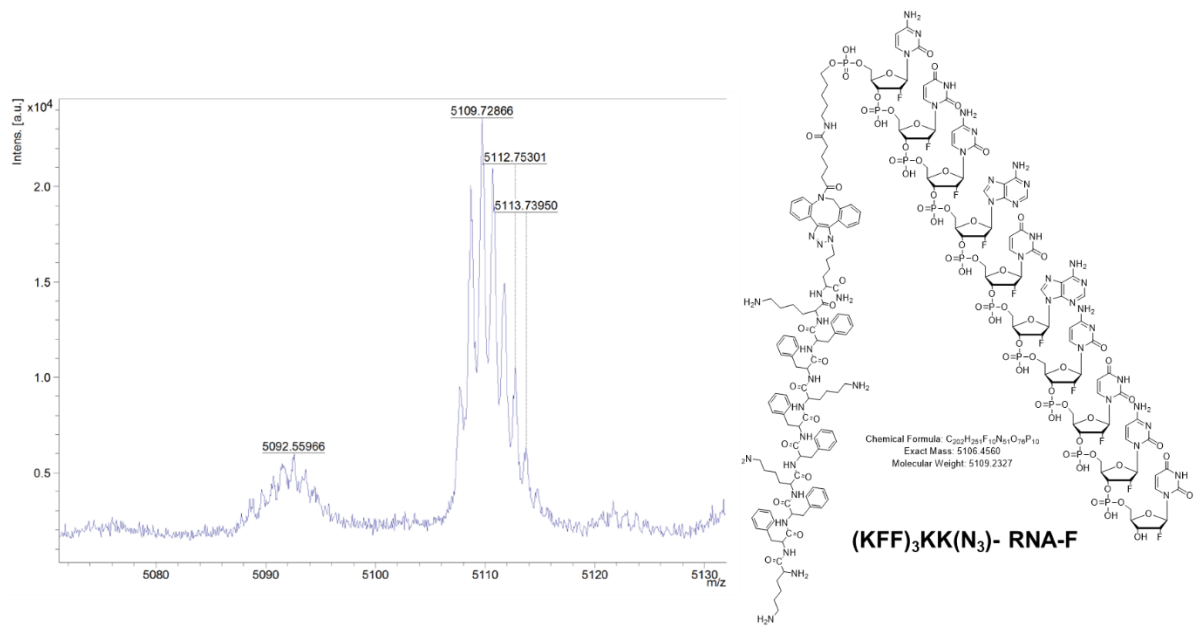

**C**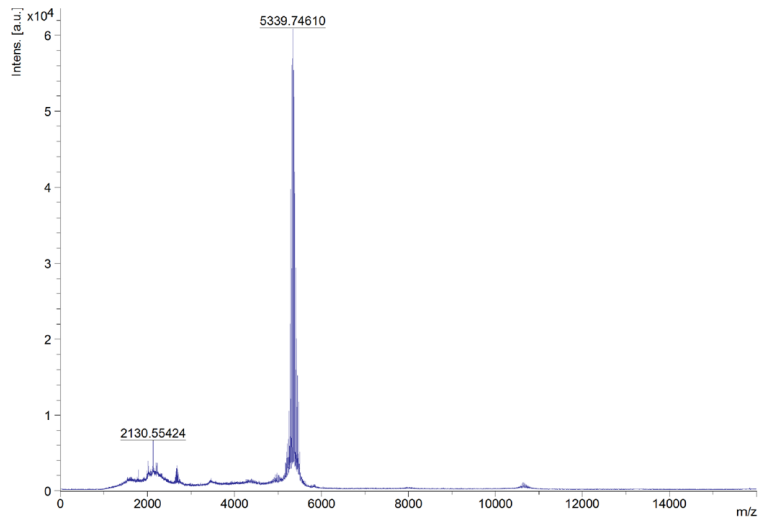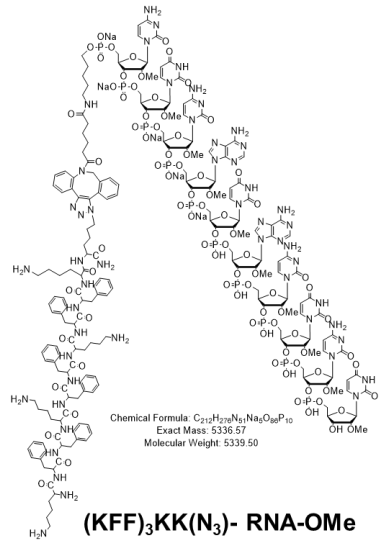**D**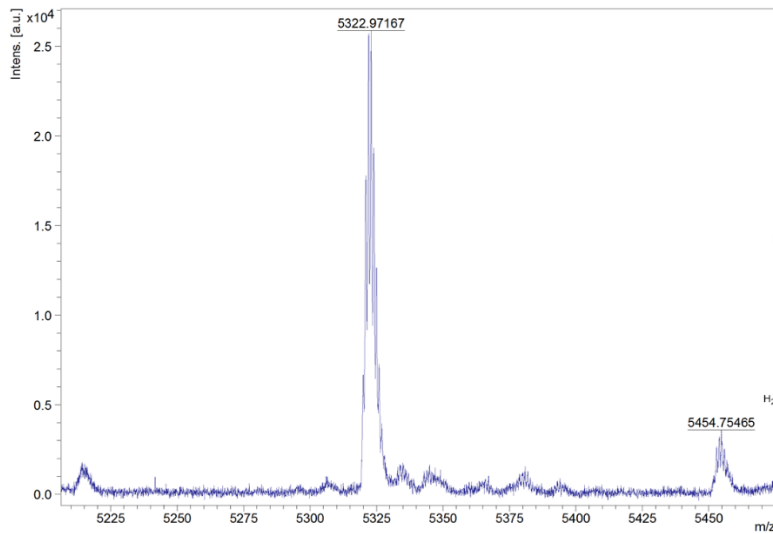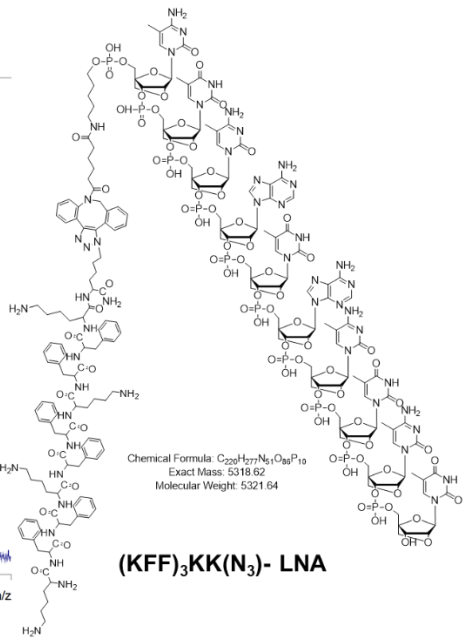

**E**

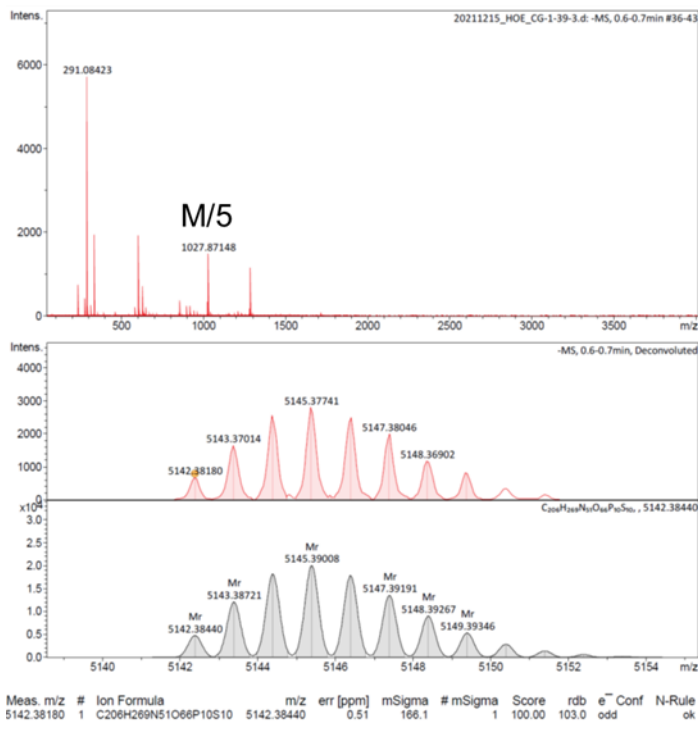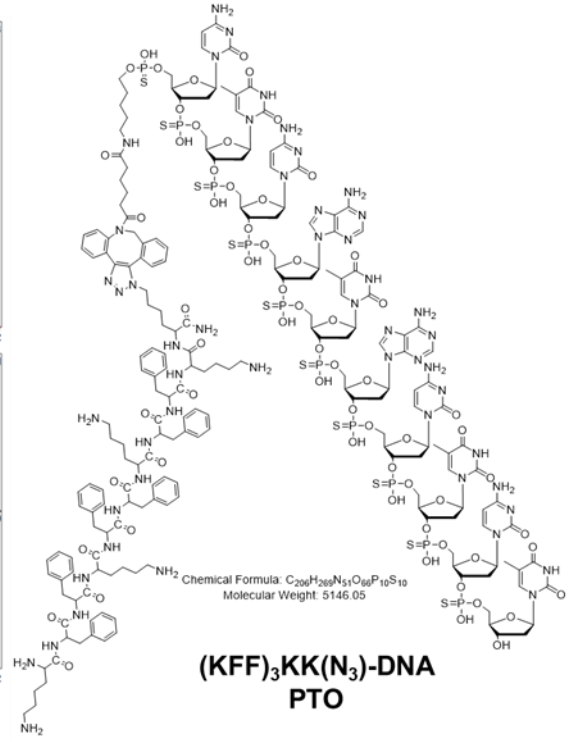

**F**

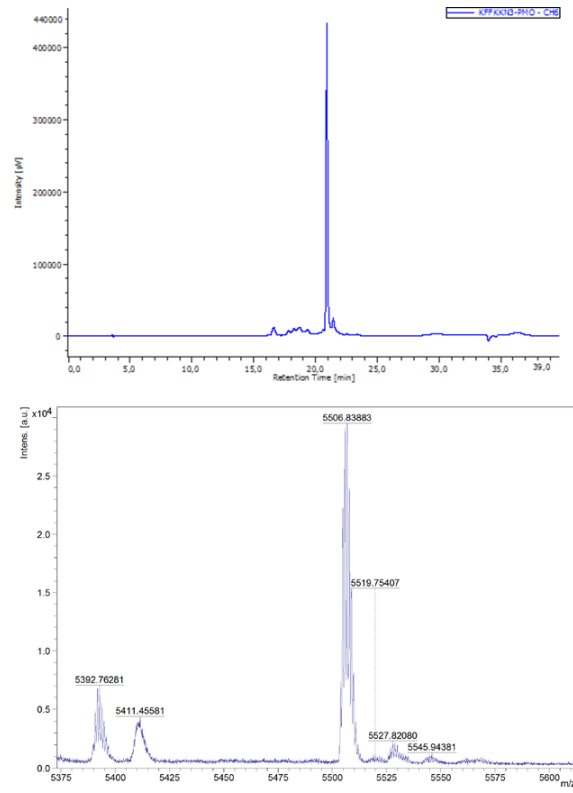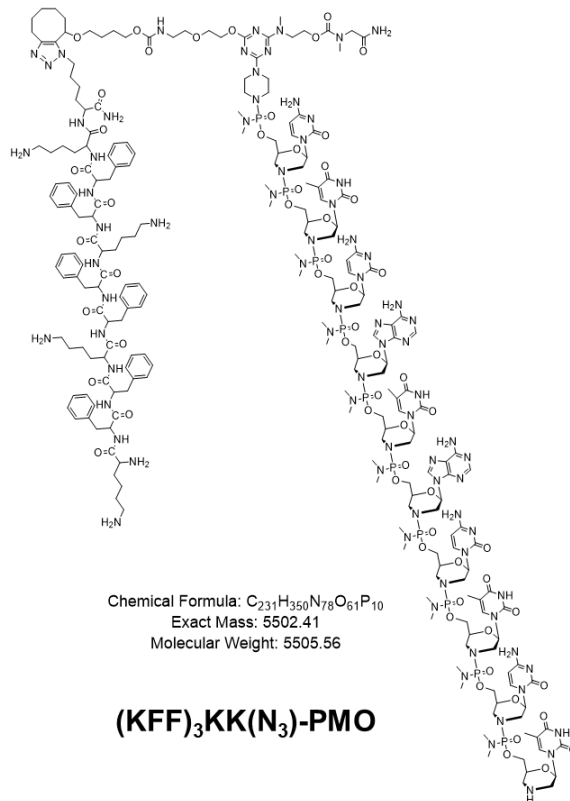

**G**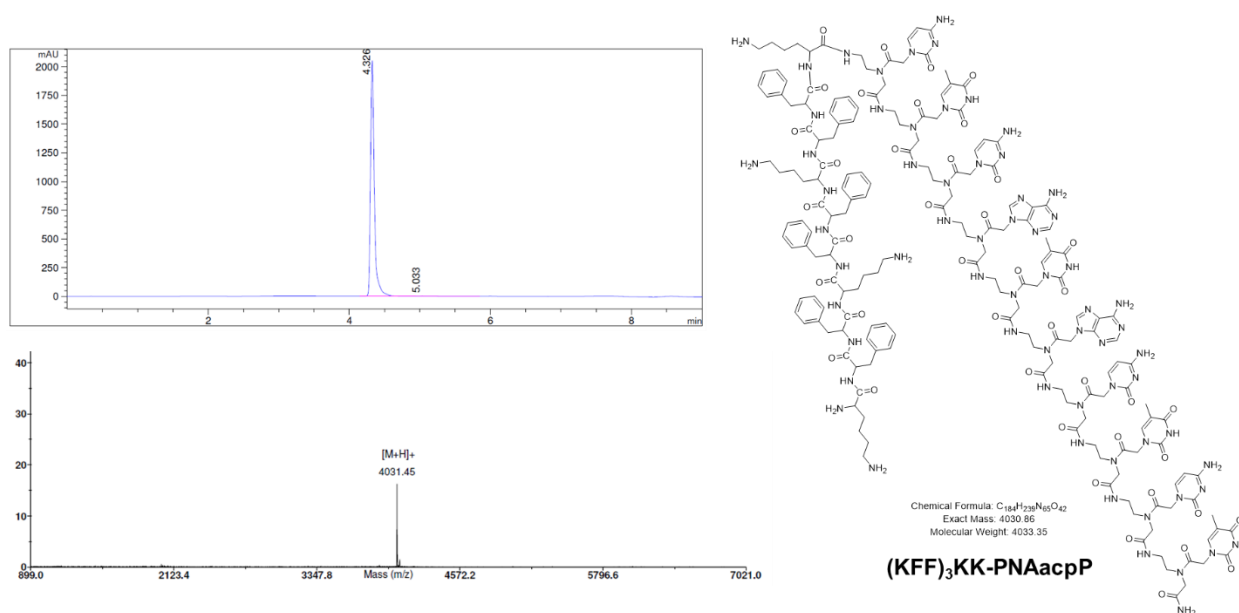**H**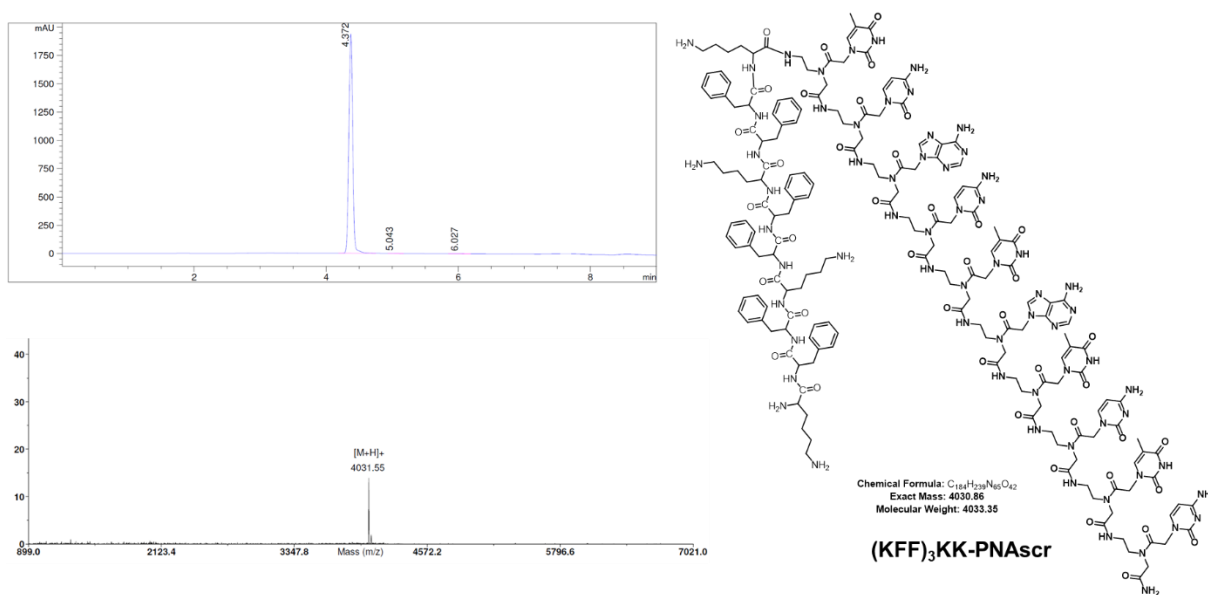

**Supplementary Figure S2. Structures and mass spectra of KFF conjugated ASOs used in this study.** Structures and mass spectra (MALDI or ESI-MS) of (KFF)<sub>3</sub>KK(N<sub>3</sub>) conjugated to RNA-MOE (A), RNA-F (B), RNA-OMe (C), LNA (D), DNA-PTO (E) PMO (F), KFF<sub>3</sub>K-PNAacpP (G) and KFF<sub>3</sub>K-PNAscR. The upper panel of panels F-H show HPLC chromatograms of the PMO and PNA conjugates.

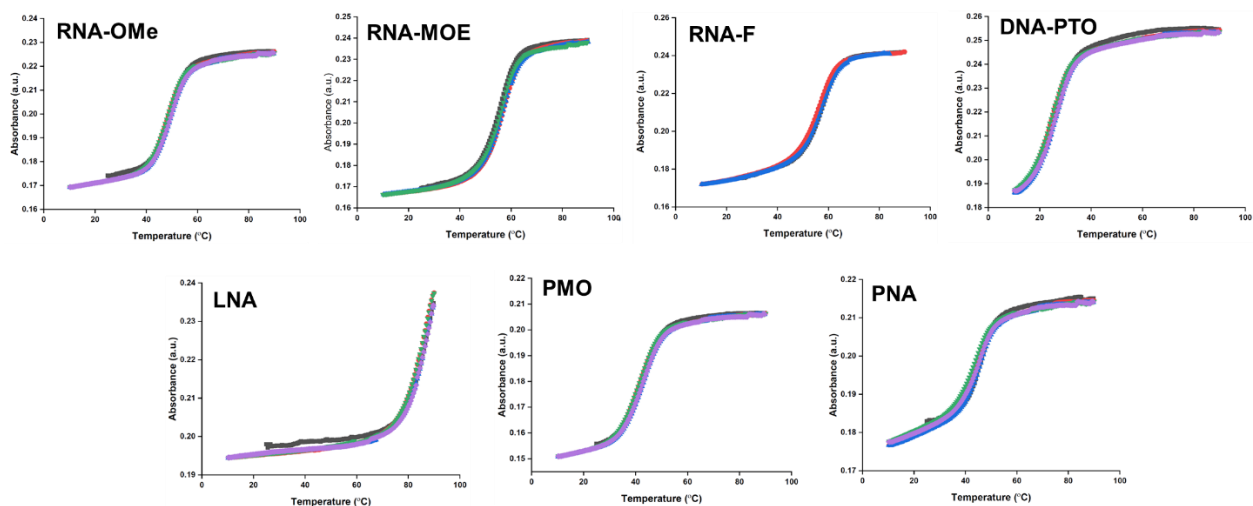

**Supplementary Figure S3. Assessment of melting temperatures of each ASO:RNA duplex.** Thermal melting curves of ASOs hybridized to target *acpP* RNA (10 nt). At least three cycles of melting and cooling have been performed for all the samples

**A**

**RNA OMe**

Dose Response

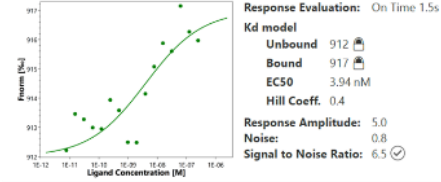

**RNA F**

Dose Response

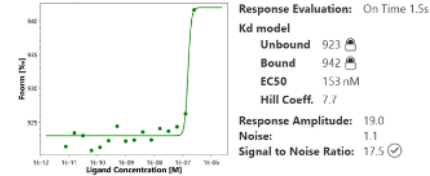

**RNA MOE**

Dose Response

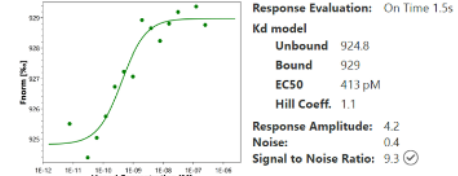

**DNA PTO**

Dose Response

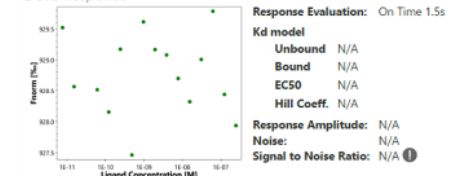

**LNA**

Dose Response

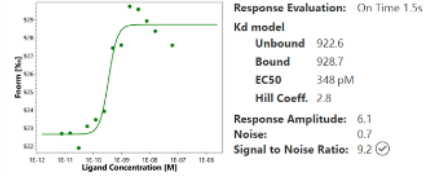

**PMO**

Dose Response

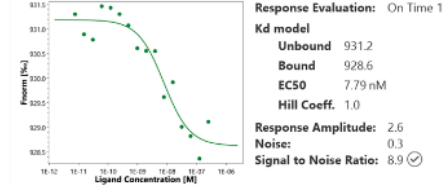

**PNA-acpP**

Dose Response

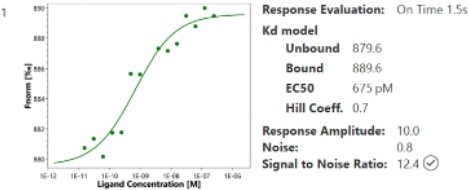

**PNA-scr**

Dose Response

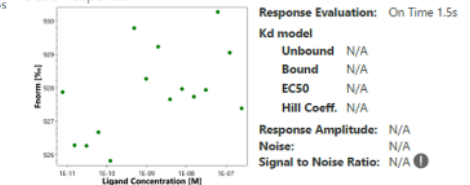

**B**

**RNA OMe**

Dose Response

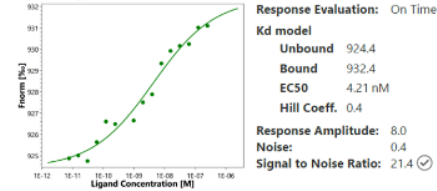

**RNA F**

Dose Response

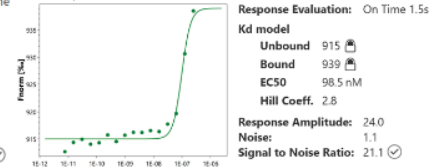

**RNA MOE**

Dose Response

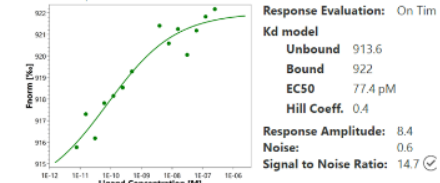

**DNA PTO**

Dose Response

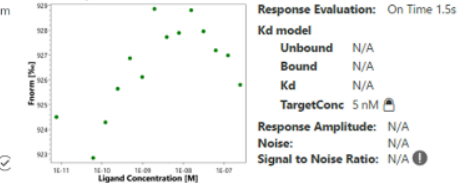

**LNA**

Dose Response

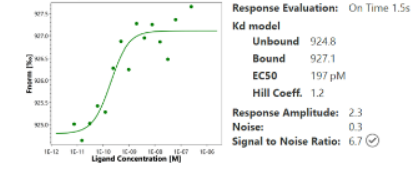

**PMO**

Dose Response

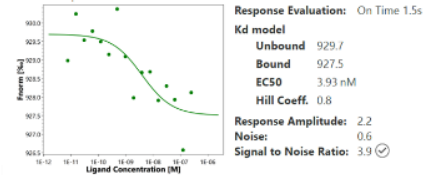

**PNA-acpP**

Dose Response

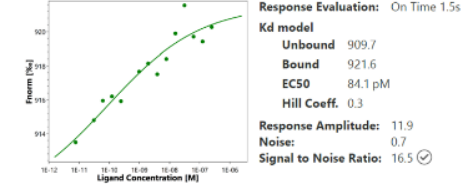

**PNA-scr**

Dose Response

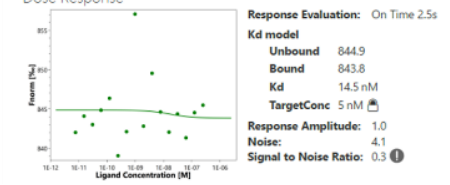

**Supplementary Figure S4. Microscale thermophoresis assay.** PNA with a scrambled sequence was used as a negative control. Data of two independent experiments (presented in panel A and B) were analyzed to obtain  $\Delta F_{\text{norm}}$  values using the MO Affinity Analysis software (NanoTemper Technologies GmbH, Munich, Germany). The fitting for  $EC_{50}$  values was done with the Hill equation using the MO Affinity Analysis software. The  $EC_{50}$  values presented in Table 1 are the mean  $\pm$  S.D. of these two independent experiments. Please note that the opposite trend of the binding curve observed for the PMO sample is a common occurrence in MST technology. The 'direction' of the curve is dependent on the specific properties of the measured molecules and does not influence the analysis.

## Repeat 1

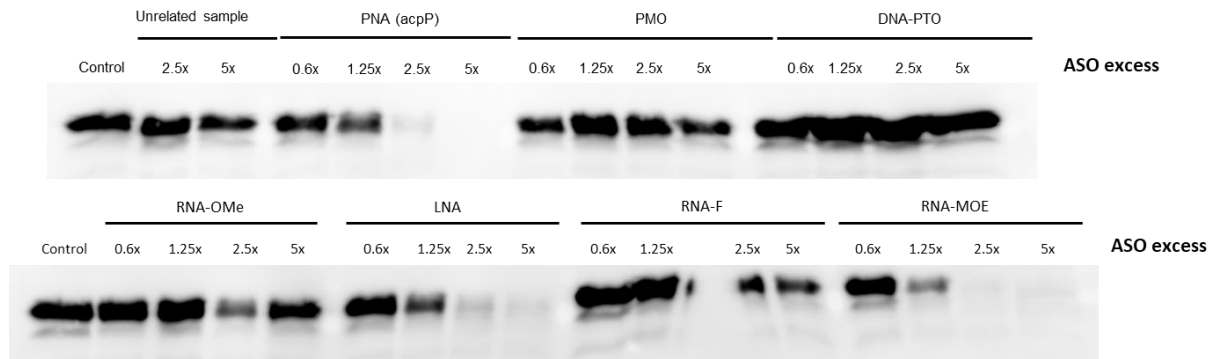

## Repeat 2

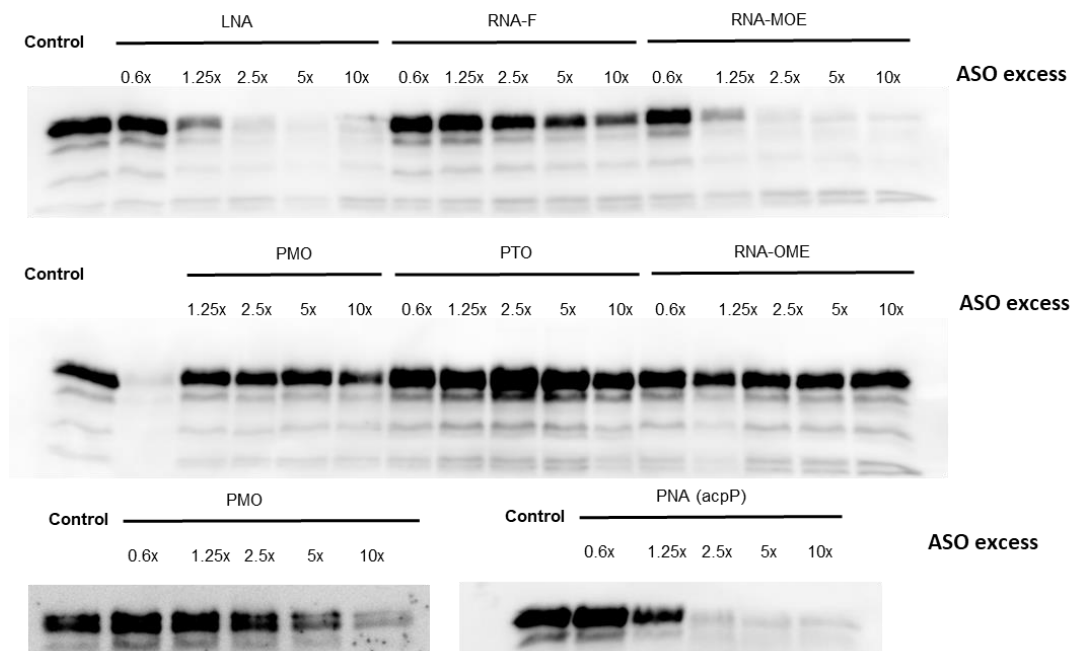

**Supplementary Figure S5. *In vitro* translation assay.** Western blot analysis of *in vitro* translation reactions using the acpP(1-17)::gfp mRNA as template and different ASO concentrations ranging from 0.625  $\mu$ M to 10  $\mu$ M as indicated. Blots were probed with anti-GFP antibody. Results from two independent *in vitro* translation experiments are presented. Control used here is water. In repeat 2, the PMO sample was run a third time to include the 0.6x concentration and this gel was used for the quantitation presented in Figure 3.

**A**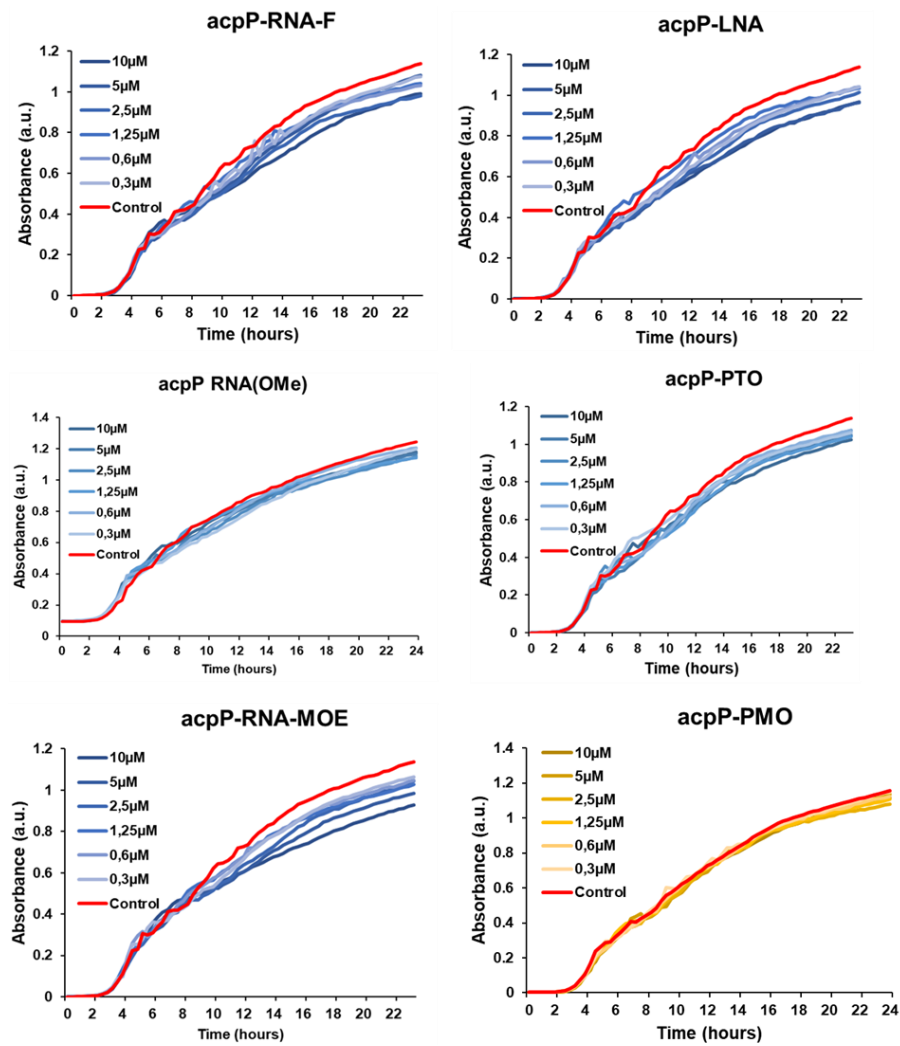**B**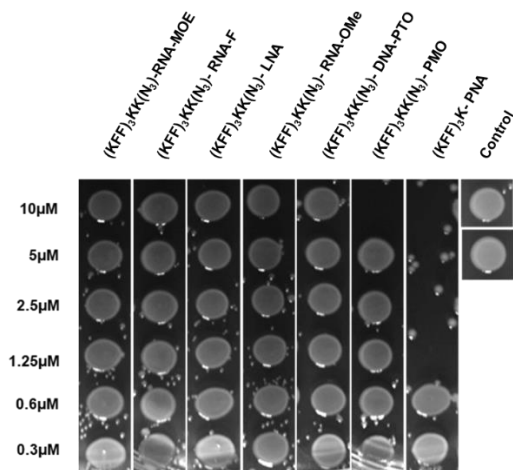

**Supplementary Figure S6. Antibacterial assays.** A. Growth kinetics of *Salmonella* treated with unconjugated ASOs. Unconjugated PNA is not included here, but was previously shown to be inactive against *Salmonella* (see *Nucleic Acids Res*, 2021, 49, 4705) B. Spotting assay of *Salmonella* treated with KFF-ASO conjugates.

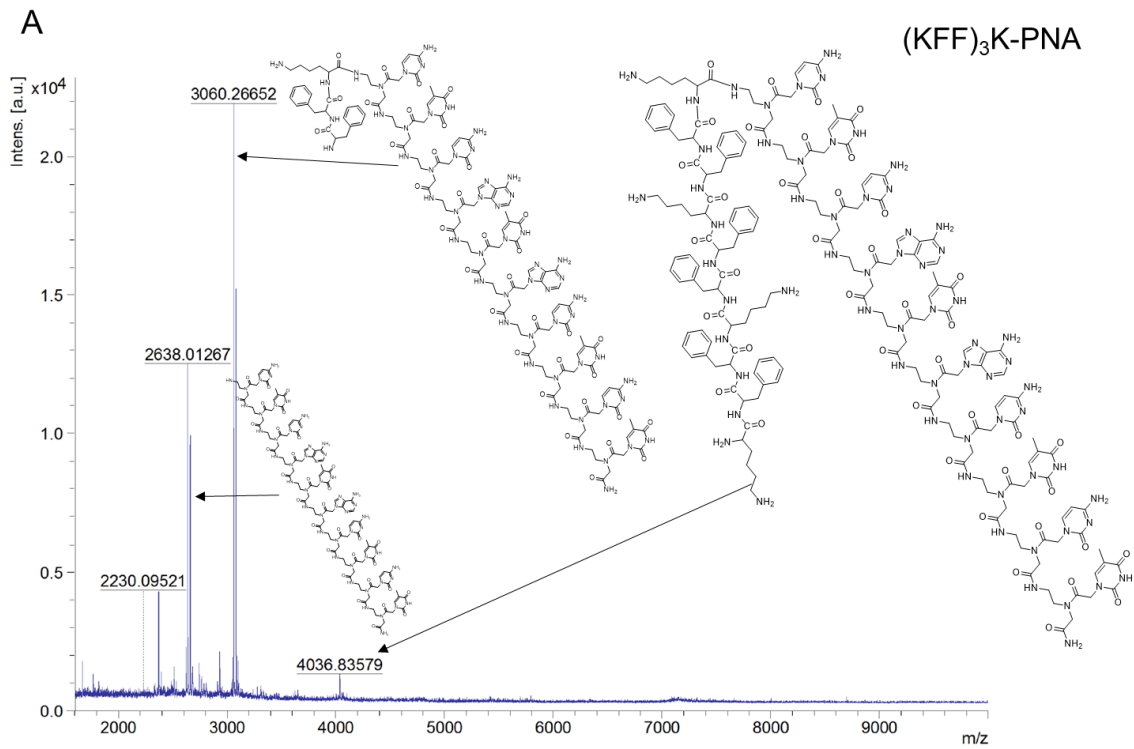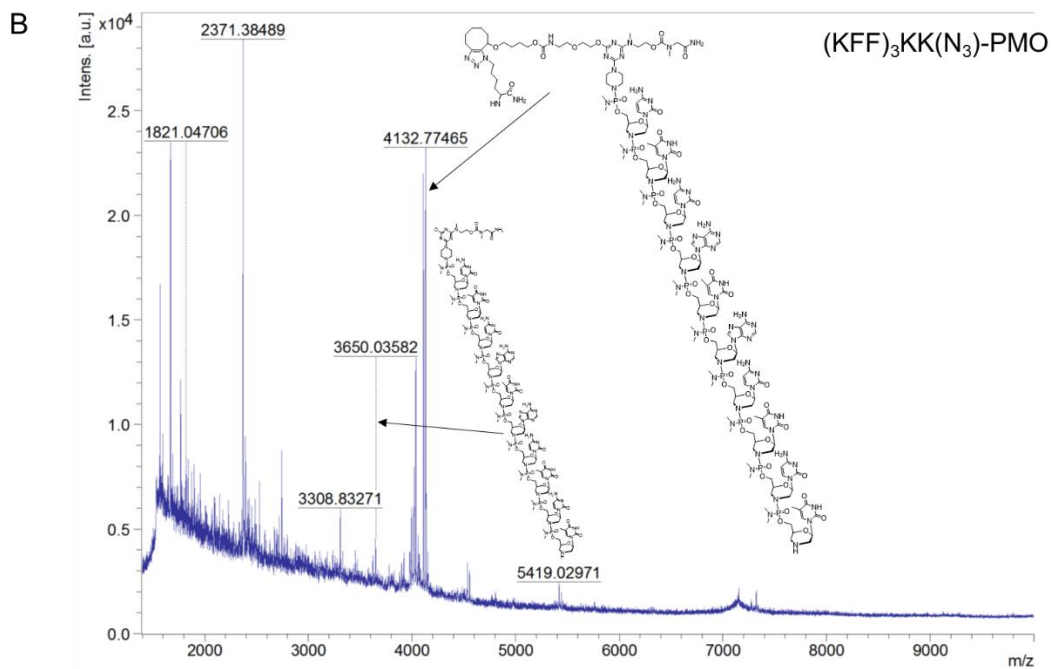

**Supplementary Figure S7. Detection of fragments of KFF conjugates of PNA and PMO in the periplasm of *Salmonella*.** MALDI-TOF based detection of fragments of KFF conjugates of PNA (A) and PMO (B) in the periplasm of *Salmonella* 15 minutes post-treatment.

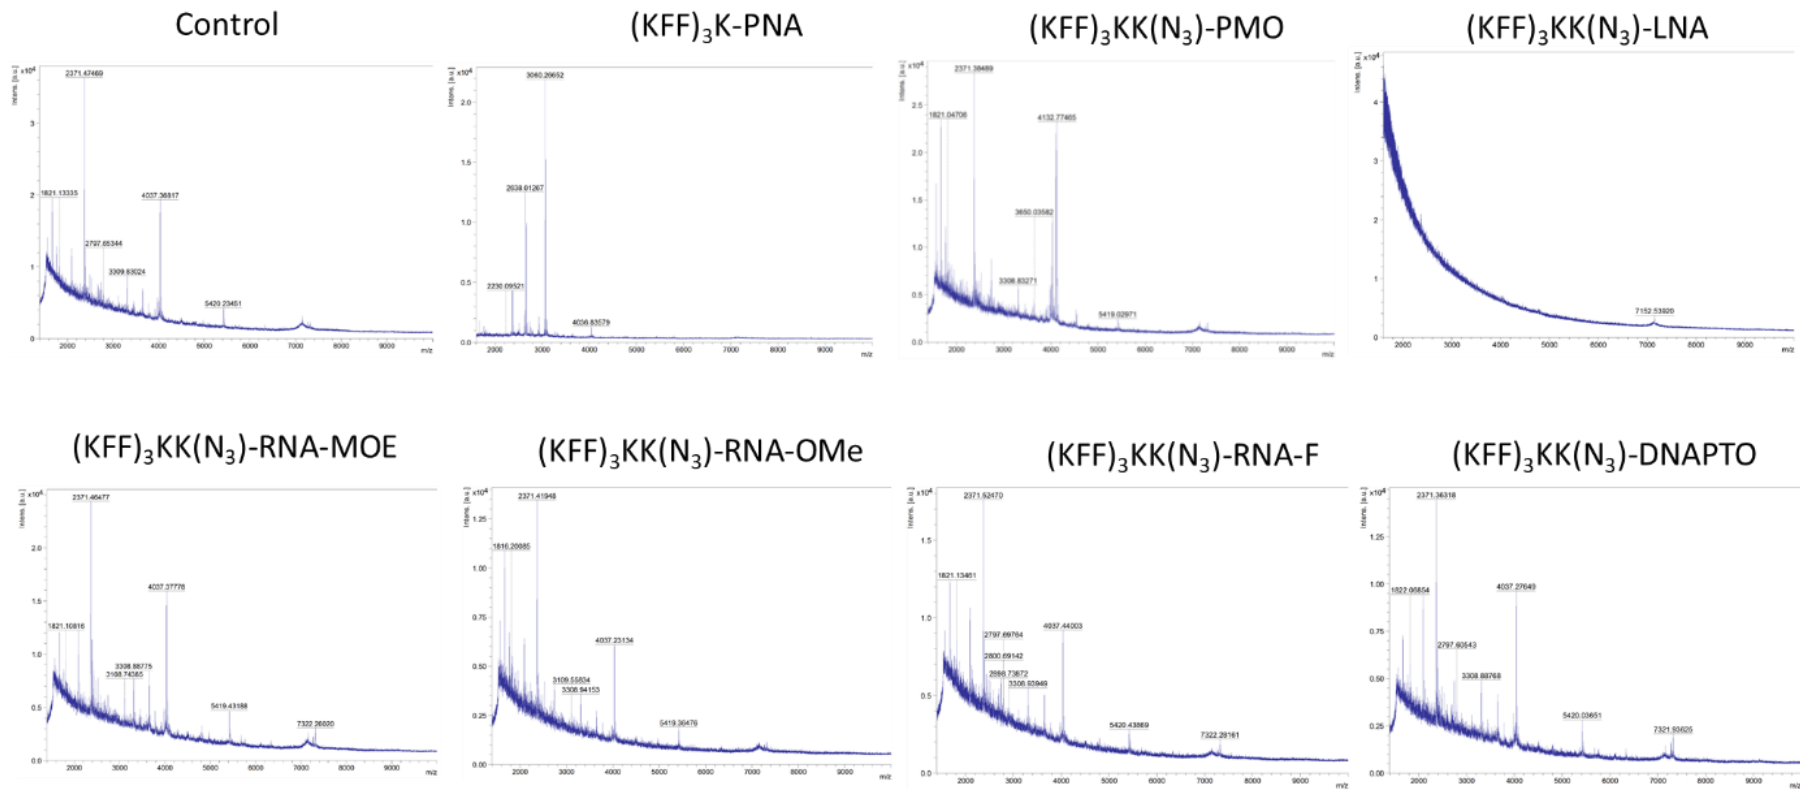

Figure S8: MALDI-TOF spectra of the periplasm of *Salmonella* post-treatment with different KFF-ASO conjugates.

**Supplementary Table S1. Oligonucleotide sequences used for the generation of the AcpP(1-17)::GFP fusion construct.** Table includes internal oligonucleotide number (JVO-), target gene name, and the respective oligonucleotide sequence in 5' to 3' orientation. Fw: forward, rv: reverse. Underlined sequence: T7 promoter sequence, italic sequence: overlap with *gfp*.

| Oligo (JVO-) | Gene            | Sequence (5'-3')                                            |
|--------------|-----------------|-------------------------------------------------------------|
| 19760        | <i>acpP</i> -fw | <u>TAATACGACTCACTATAGA</u> ACCATCGCGAAAGCGAGTT              |
| 19761        | <i>acpP</i> -rv | <i>TCCAGTGAAAAGTTCTTCTCCTTTGCTAGCGCCCAGCTGTT</i> CGCCGATAAT |
| 19762        | <i>gfp</i> -fw  | GCTAGCAAAGGAGAAGAACTTTTCAC                                  |
| 19763        | <i>gfp</i> -rv  | TTATTTGTAGAGCTCATCCATGCC                                    |
